# Supplementary material for: Formation of particulate organic carbon from dissolved substrate input enhances soil carbon sequestration
Source: Copernicus journal article supplement (doi:10.5194/egusphere-2023-1483), 2023-07-25
Supplement: Supplementary file 1 [file egusphere-2023-1483-supplement.pdf]

**Table S1.** The amount of carbon (C) input of different sites in modeling experiments. Please see Table 1 for abbreviations.

| Site              | DOC input only                                  |     | DOC+POC input                                   |     |
|-------------------|-------------------------------------------------|-----|-------------------------------------------------|-----|
|                   | (g C kg <sup>-1</sup> soil year <sup>-1</sup> ) |     | (g C kg <sup>-1</sup> soil year <sup>-1</sup> ) |     |
|                   | DOC                                             | POC | DOC                                             | POC |
| DL <sub>in</sub>  | 6                                               | 0   | 6                                               | 6   |
| DL <sub>out</sub> | 10                                              | 0   | 10                                              | 10  |
| GY <sub>in</sub>  | 4                                               | 0   | 4                                               | 4   |
| GY <sub>out</sub> | 4                                               | 0   | 4                                               | 4   |
| HL <sub>in</sub>  | 2                                               | 0   | 2                                               | 2   |
| HL <sub>out</sub> | 2                                               | 0   | 2                                               | 2   |
| XL <sub>in</sub>  | 2                                               | 0   | 2                                               | 2   |
| XL <sub>out</sub> | 2                                               | 0   | 2                                               | 2   |
| XH <sub>in</sub>  | 2                                               | 0   | 2                                               | 2   |
| XH <sub>out</sub> | 2                                               | 0   | 2                                               | 2   |

**Table S2.** Results of the two-way analysis of variance (ANOVA) on the effects of sites, fencing, and their interaction (sites: fencing) on glucose-derived SOC, MAOC, POC, MBC, and DOC. The SOC content is the sum of the sizes of the other four carbon pools combined.

|                             | Df | Sum Sq                | F-value               | P-value          |
|-----------------------------|----|-----------------------|-----------------------|------------------|
| <b>Glucose-derived SOC</b>  |    |                       |                       |                  |
| Sites                       | 4  | $3.85 \times 10^{-2}$ | $1.10 \times 10^2$    | <b>&lt;0.001</b> |
| Fencing                     | 1  | $9.00 \times 10^{-5}$ | $9.75 \times 10^{-1}$ | 0.331            |
| Sites: Fencing              | 4  | $9.00 \times 10^{-4}$ | 2.58                  | 0.058            |
| Residuals                   | 30 | $2.62 \times 10^{-3}$ |                       |                  |
| <b>Glucose-derived MAOC</b> |    |                       |                       |                  |
| Sites                       | 4  | $3.94 \times 10^{-3}$ | $3.95 \times 10^1$    | <b>&lt;0.001</b> |
| Fencing                     | 1  | $3.18 \times 10^{-4}$ | $1.27 \times 10^1$    | <b>&lt;0.01</b>  |
| Sites: Fencing              | 4  | $4.78 \times 10^{-4}$ | 4.79                  | <b>&lt;0.01</b>  |
| Residuals                   | 30 | $7.48 \times 10^{-4}$ |                       |                  |
| <b>Glucose-derived POC</b>  |    |                       |                       |                  |
| Sites                       | 4  | $7.15 \times 10^{-3}$ | $1.74 \times 10^2$    | <b>&lt;0.001</b> |
| Fencing                     | 1  | $4.00 \times 10^{-5}$ | 3.85                  | 0.059            |
| Sites: Fencing              | 4  | $7.78 \times 10^{-4}$ | $1.90 \times 10^1$    | <b>&lt;0.001</b> |
| Residuals                   | 30 | $3.08 \times 10^{-4}$ |                       |                  |
| <b>Glucose-derived MBC</b>  |    |                       |                       |                  |
| Sites                       | 4  | $4.43 \times 10^{-3}$ | $1.83 \times 10^1$    | <b>&lt;0.001</b> |
| Fencing                     | 1  | $6.00 \times 10^{-6}$ | $1.02 \times 10^{-1}$ | 0.752            |
| Sites: Fencing              | 4  | $2.28 \times 10^{-4}$ | $9.37 \times 10^{-1}$ | 0.456            |
| Residuals                   | 30 | $1.82 \times 10^{-3}$ |                       |                  |
| <b>Glucose-derived DOC</b>  |    |                       |                       |                  |
| Sites                       | 4  | $1.62 \times 10^{-7}$ | 8.89                  | <b>&lt;0.001</b> |
| Fencing                     | 1  | $3.42 \times 10^{-8}$ | 7.50                  | <b>&lt;0.05</b>  |
| Sites: Fencing              | 4  | $5.08 \times 10^{-8}$ | 2.78                  | <b>&lt;0.05</b>  |
| Residuals                   | 30 | $1.37 \times 10^{-7}$ |                       |                  |

**Table S3.** The posterior maximum likelihood estimates (MLE) of the parameters.

| Parameter       | DL <sub>in</sub>      |                       | DL <sub>out</sub>     |                       | GY <sub>in</sub>      |                       | GY <sub>out</sub>     |                       | HL <sub>in</sub>      |                       |
|-----------------|-----------------------|-----------------------|-----------------------|-----------------------|-----------------------|-----------------------|-----------------------|-----------------------|-----------------------|-----------------------|
|                 | model I               | model II              |
| f <sub>P</sub>  | 0.326                 | 0.327                 | 0.406                 | 0.408                 | 0.290                 | 0.290                 | 0.290                 | 0.290                 | 0.289                 | 0.290                 |
| k <sub>D</sub>  | 1.86×10 <sup>-2</sup> | 1.87×10 <sup>-2</sup> | 2.26×10 <sup>-2</sup> | 2.23×10 <sup>-2</sup> | 2.01×10 <sup>-2</sup> | 2.09×10 <sup>-2</sup> | 1.45×10 <sup>-2</sup> | 1.45×10 <sup>-2</sup> | 1.64×10 <sup>-2</sup> | 1.68×10 <sup>-2</sup> |
| k <sub>B</sub>  | 6.05×10 <sup>-4</sup> | 6.05×10 <sup>-4</sup> | 2.48×10 <sup>-3</sup> | 2.37×10 <sup>-3</sup> | 2.86×10 <sup>-3</sup> | 3.01×10 <sup>-3</sup> | 1.92×10 <sup>-3</sup> | 2.80×10 <sup>-3</sup> | 6.99×10 <sup>-4</sup> | 7.50×10 <sup>-4</sup> |
| k <sub>P</sub>  | 3.95×10 <sup>-4</sup> | 3.97×10 <sup>-4</sup> | 2.65×10 <sup>-4</sup> | 2.68×10 <sup>-4</sup> | 2.02×10 <sup>-4</sup> | 2.07×10 <sup>-4</sup> | 2.64×10 <sup>-4</sup> | 2.74×10 <sup>-4</sup> | 4.97×10 <sup>-5</sup> | 5.99×10 <sup>-5</sup> |
| k <sub>M</sub>  | 6.00×10 <sup>-5</sup> | 5.94×10 <sup>-5</sup> | 3.70×10 <sup>-5</sup> | 3.71×10 <sup>-5</sup> | 9.31×10 <sup>-5</sup> | 9.89×10 <sup>-5</sup> | 7.92×10 <sup>-5</sup> | 8.32×10 <sup>-5</sup> | 4.17×10 <sup>-6</sup> | 4.65×10 <sup>-6</sup> |
| f <sub>MB</sub> | 0.350                 | 0.350                 | 0.349                 | 0.349                 | 0.350                 | 0.350                 | 0.353                 | 0.353                 | 0.384                 | 0.378                 |
| f <sub>MP</sub> | 0.087                 | 0.086                 | 0.074                 | 0.068                 | 0.096                 | 0.092                 | 0.119                 | 0.115                 | 0.170                 | 0.152                 |
| f <sub>PB</sub> | -                     | 0.293                 | -                     | 0.261                 | -                     | 0.249                 | -                     | 0.253                 | -                     | 0.253                 |
| f <sub>DP</sub> | 0.260                 | 0.260                 | 0.225                 | 0.205                 | 0.550                 | 0.551                 | 0.554                 | 0.553                 | 0.578                 | 0.570                 |
| f <sub>DM</sub> | 0.340                 | 0.339                 | 0.340                 | 0.335                 | 0.454                 | 0.448                 | 0.475                 | 0.468                 | 0.514                 | 0.490                 |
| f <sub>BD</sub> | 0.238                 | 0.236                 | 0.377                 | 0.369                 | 0.554                 | 0.552                 | 0.560                 | 0.559                 | 0.652                 | 0.647                 |

  

| Parameter       | HL <sub>out</sub>     |                       | XL <sub>in</sub>      |                       | XL <sub>out</sub>     |                       | XH <sub>in</sub>      |                       | XH <sub>out</sub>     |                       |
|-----------------|-----------------------|-----------------------|-----------------------|-----------------------|-----------------------|-----------------------|-----------------------|-----------------------|-----------------------|-----------------------|
|                 | model I               | model II              |
| f <sub>P</sub>  | 0.203                 | 0.203                 | 0.290                 | 0.290                 | 0.290                 | 0.290                 | 0.193                 | 0.195                 | 0.200                 | 0.198                 |
| k <sub>D</sub>  | 7.45×10 <sup>-3</sup> | 7.52×10 <sup>-3</sup> | 1.52×10 <sup>-2</sup> | 1.58×10 <sup>-2</sup> | 7.83×10 <sup>-3</sup> | 8.23×10 <sup>-3</sup> | 3.01×10 <sup>-2</sup> | 3.34×10 <sup>-2</sup> | 2.96×10 <sup>-2</sup> | 2.88×10 <sup>-2</sup> |
| k <sub>B</sub>  | 5.75×10 <sup>-4</sup> | 5.76×10 <sup>-4</sup> | 5.27×10 <sup>-4</sup> | 5.41×10 <sup>-4</sup> | 1.06×10 <sup>-3</sup> | 1.27×10 <sup>-3</sup> | 1.18×10 <sup>-2</sup> | 1.43×10 <sup>-2</sup> | 7.82×10 <sup>-3</sup> | 1.39×10 <sup>-2</sup> |
| k <sub>P</sub>  | 6.86×10 <sup>-5</sup> | 6.77×10 <sup>-5</sup> | 1.60×10 <sup>-4</sup> | 1.71×10 <sup>-4</sup> | 1.60×10 <sup>-4</sup> | 1.70×10 <sup>-4</sup> | 3.66×10 <sup>-3</sup> | 4.04×10 <sup>-3</sup> | 2.85×10 <sup>-3</sup> | 3.88×10 <sup>-3</sup> |
| k <sub>M</sub>  | 6.26×10 <sup>-6</sup> | 6.28×10 <sup>-6</sup> | 1.65×10 <sup>-5</sup> | 1.71×10 <sup>-5</sup> | 4.07×10 <sup>-5</sup> | 4.17×10 <sup>-5</sup> | 4.42×10 <sup>-4</sup> | 5.17×10 <sup>-4</sup> | 6.13×10 <sup>-4</sup> | 6.77×10 <sup>-4</sup> |
| f <sub>MB</sub> | 0.349                 | 0.350                 | 0.350                 | 0.350                 | 0.306                 | 0.302                 | 0.288                 | 0.269                 | 0.526                 | 0.461                 |
| f <sub>MP</sub> | 0.092                 | 0.094                 | 0.102                 | 0.100                 | 0.103                 | 0.102                 | 0.368                 | 0.342                 | 0.541                 | 0.506                 |
| f <sub>PB</sub> | -                     | 0.096                 | -                     | 0.250                 | -                     | 0.252                 | -                     | 0.368                 | -                     | 0.385                 |
| f <sub>DP</sub> | 0.550                 | 0.550                 | 0.550                 | 0.551                 | 0.552                 | 0.551                 | 0.567                 | 0.570                 | 0.589                 | 0.581                 |
| f <sub>DM</sub> | 0.446                 | 0.449                 | 0.451                 | 0.449                 | 0.457                 | 0.455                 | 0.524                 | 0.517                 | 0.563                 | 0.483                 |
| f <sub>BD</sub> | 0.652                 | 0.651                 | 0.653                 | 0.654                 | 0.657                 | 0.656                 | 0.690                 | 0.683                 | 0.801                 | 0.791                 |

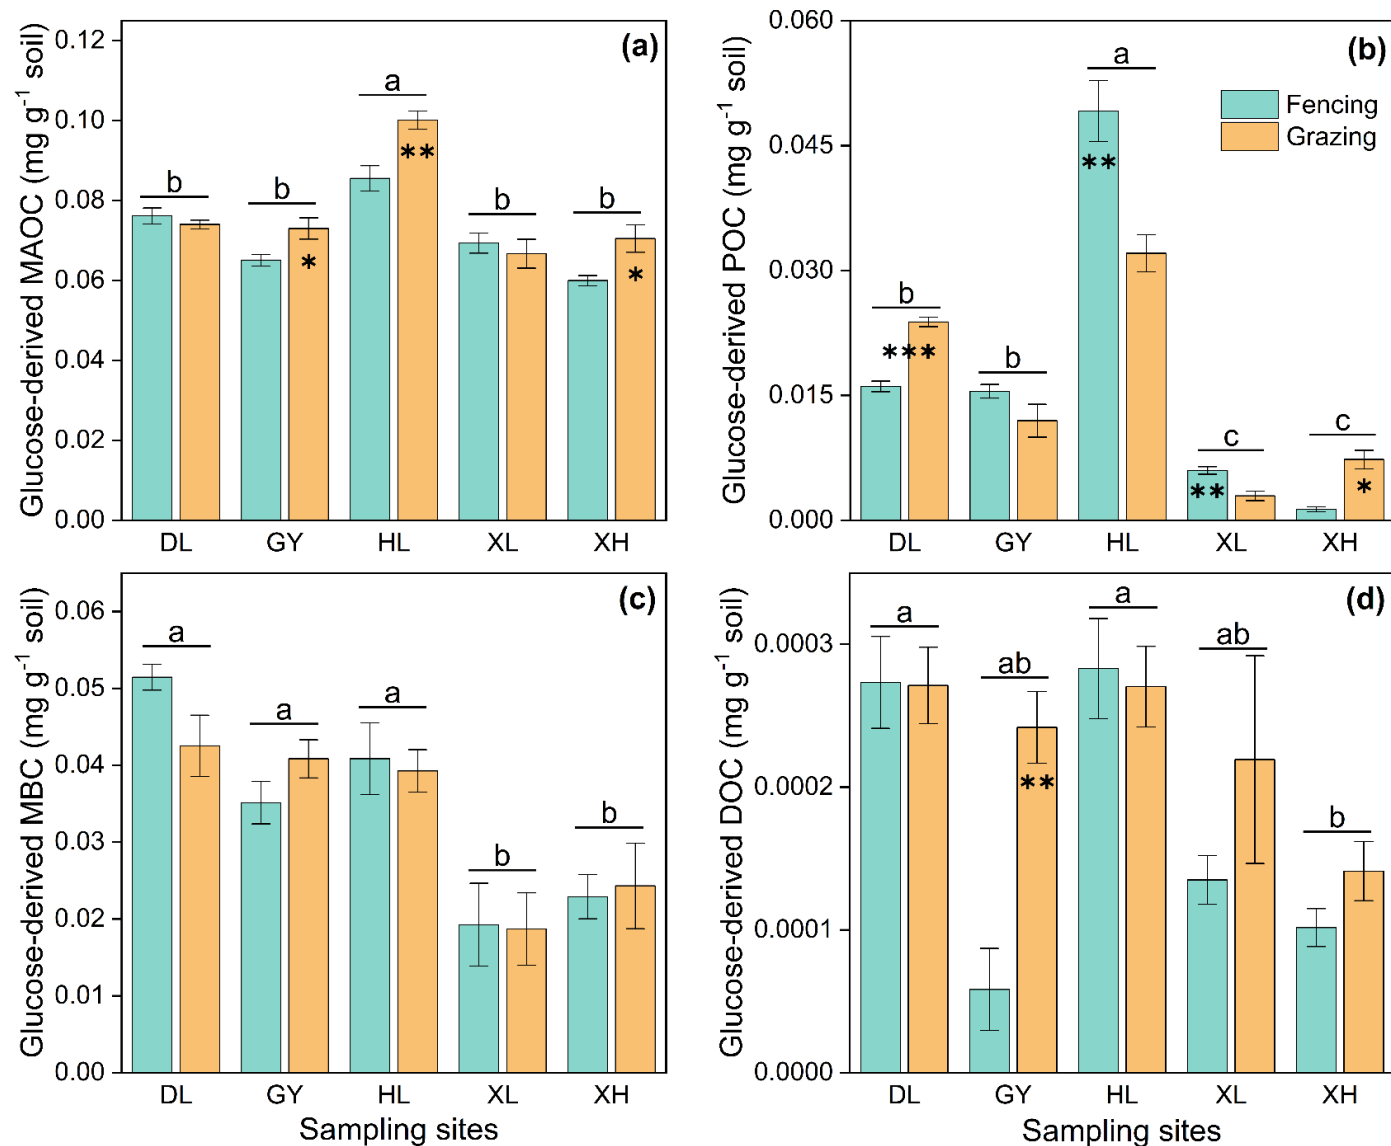

**Figure S1. Response of carbon (C) sequestration to sites and fencing.** a. Glucose-derived MAOC; b. Glucose-derived POC; c. Glucose-derived MBC; d. Glucose-derived DOC. Different letters above bars represent significant differences among sites ( $P < 0.05$ ). Asterisks represent significant differences between grazing and fencing treatment (\* $P < 0.05$ , \*\* $P < 0.01$ , \*\*\* $P < 0.001$ ).

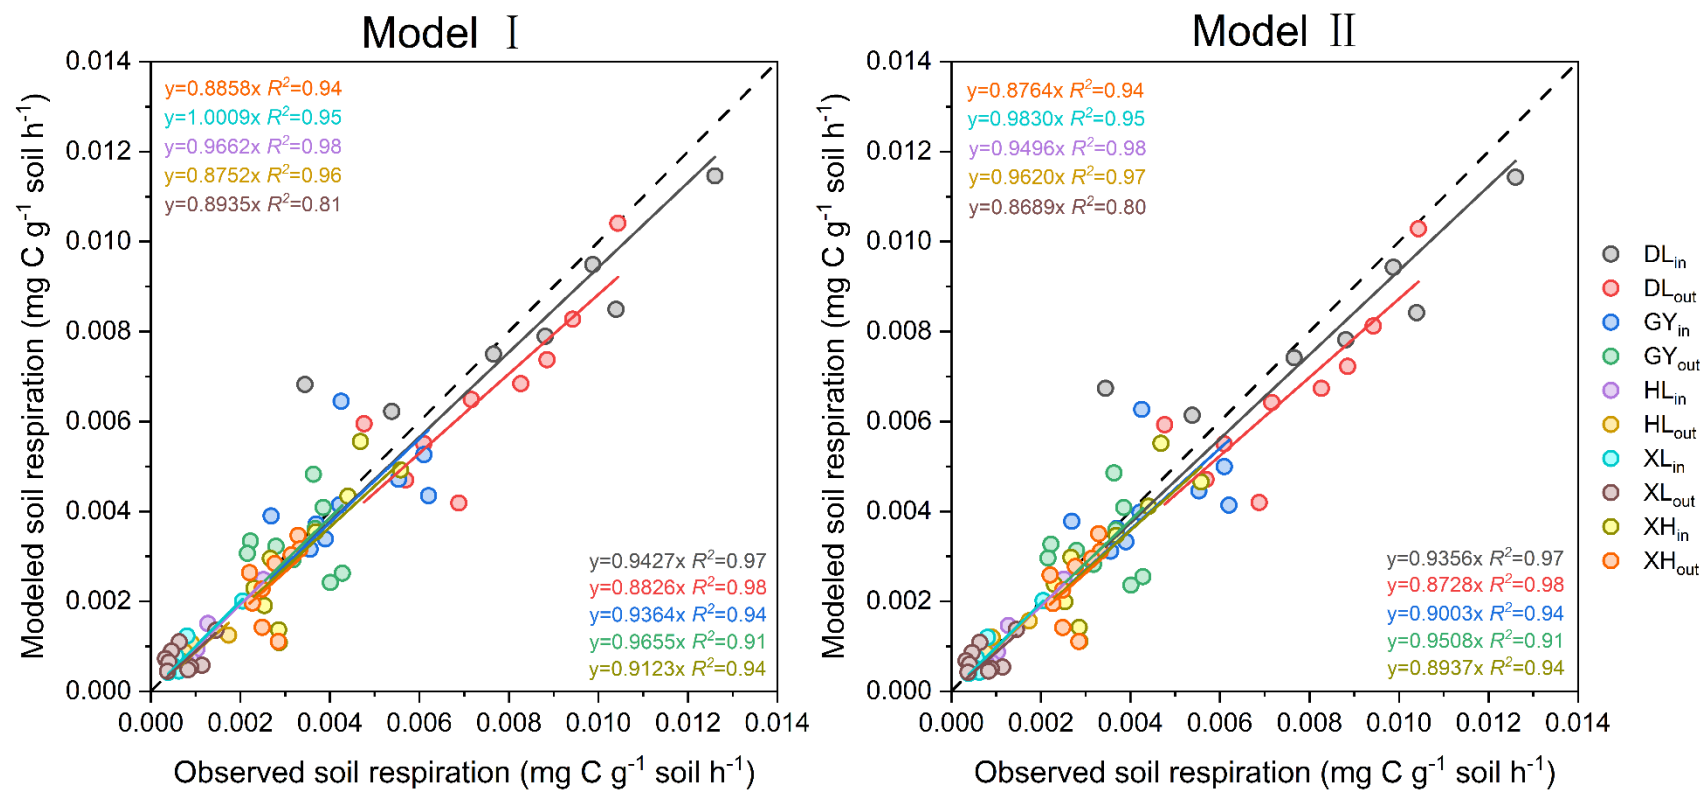

**Figure S2. Comparison of observed and modeled CO<sub>2</sub> flux in the incubation experiment. Diagonal black dotted line is 1:1 line.**

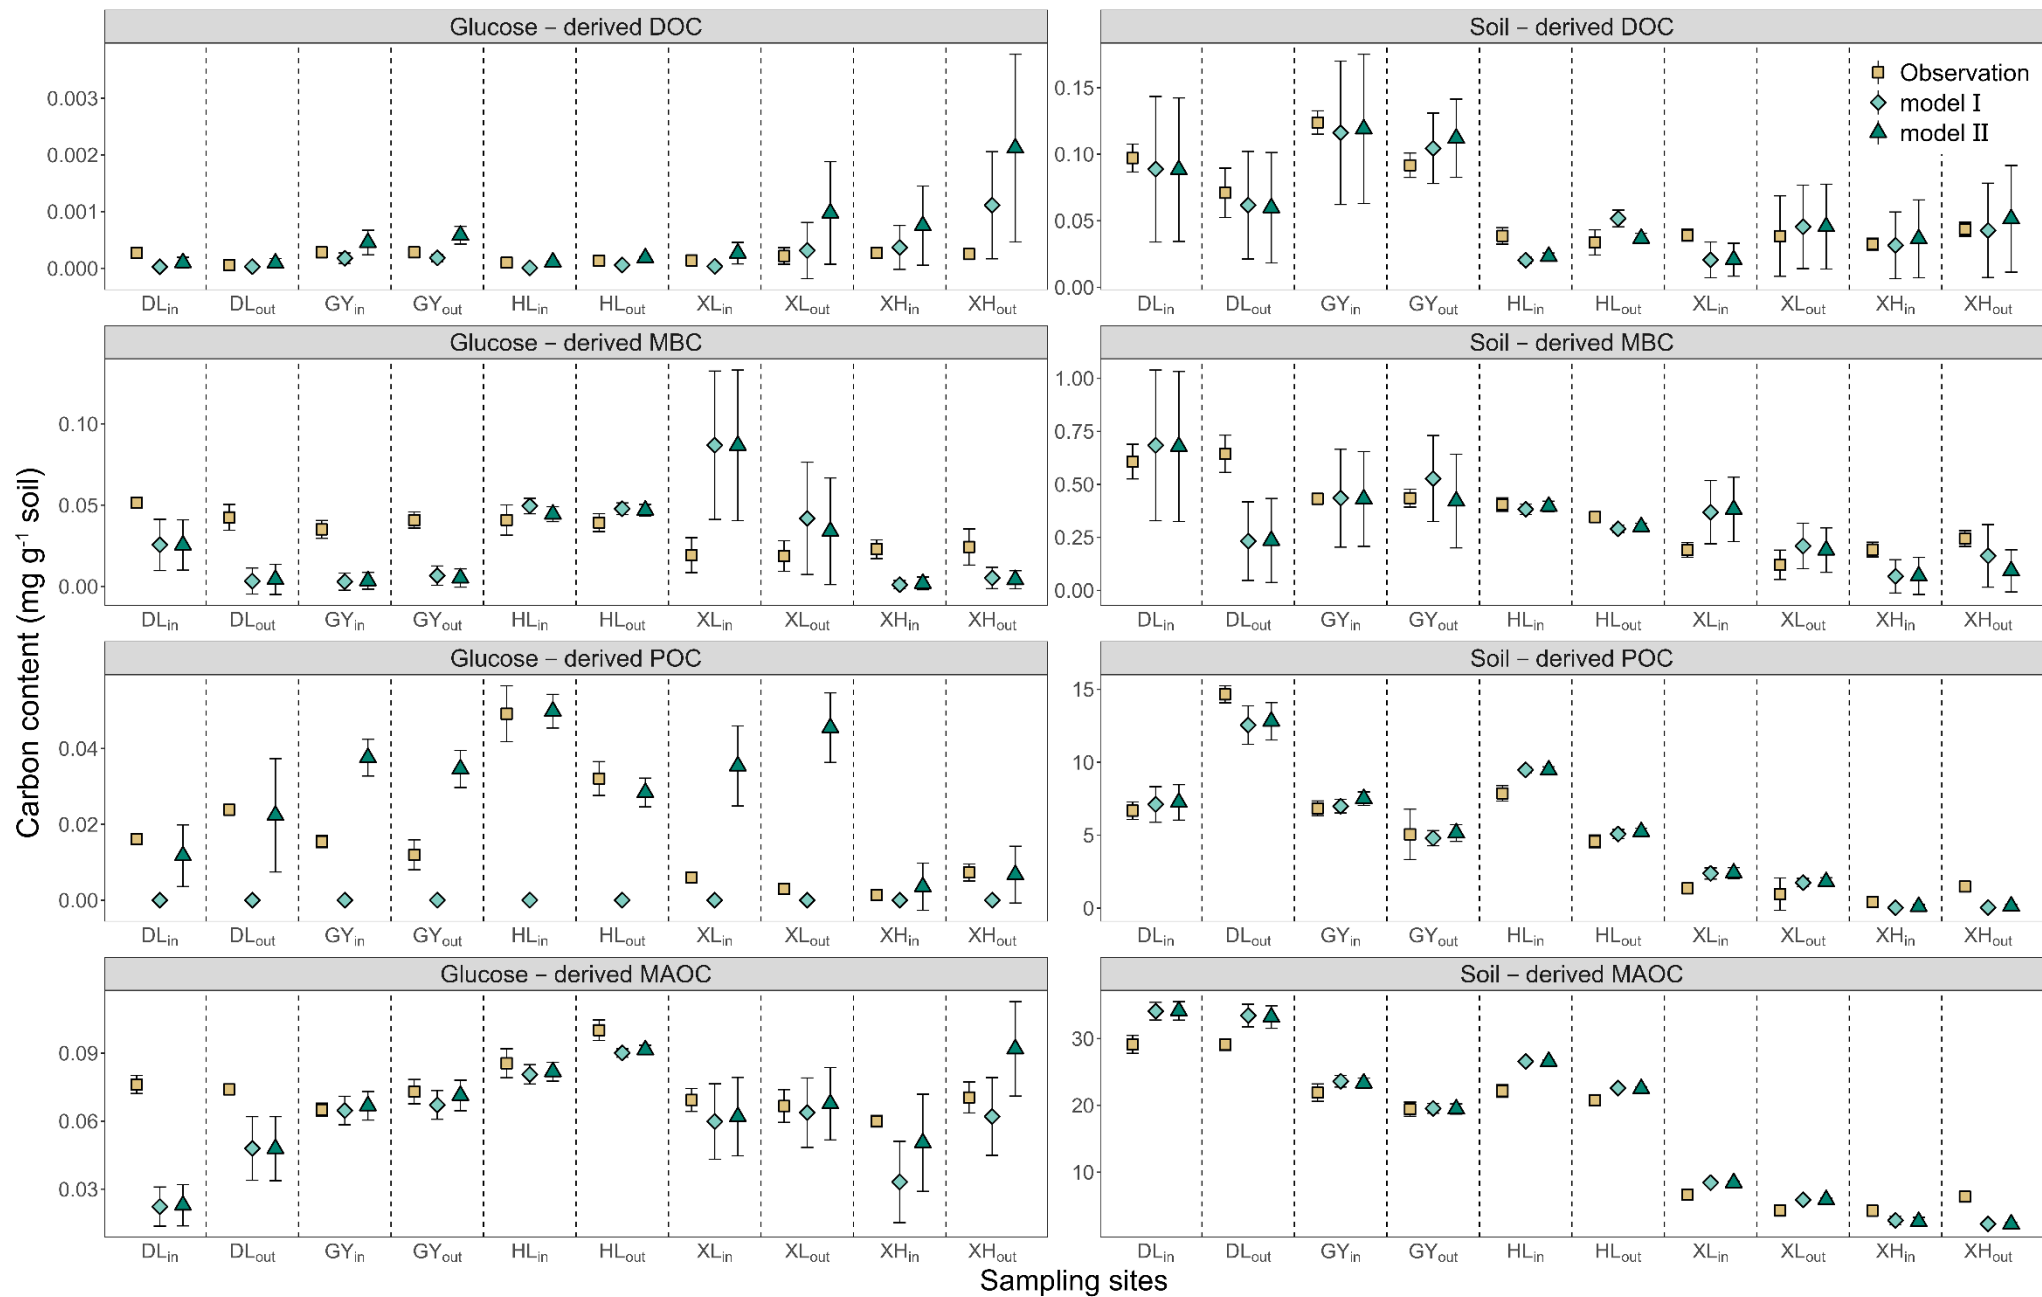

**Figure S3. Observed and modeled soil C pools by Model I and II.** The error bars represent the standard deviation of each dataset.

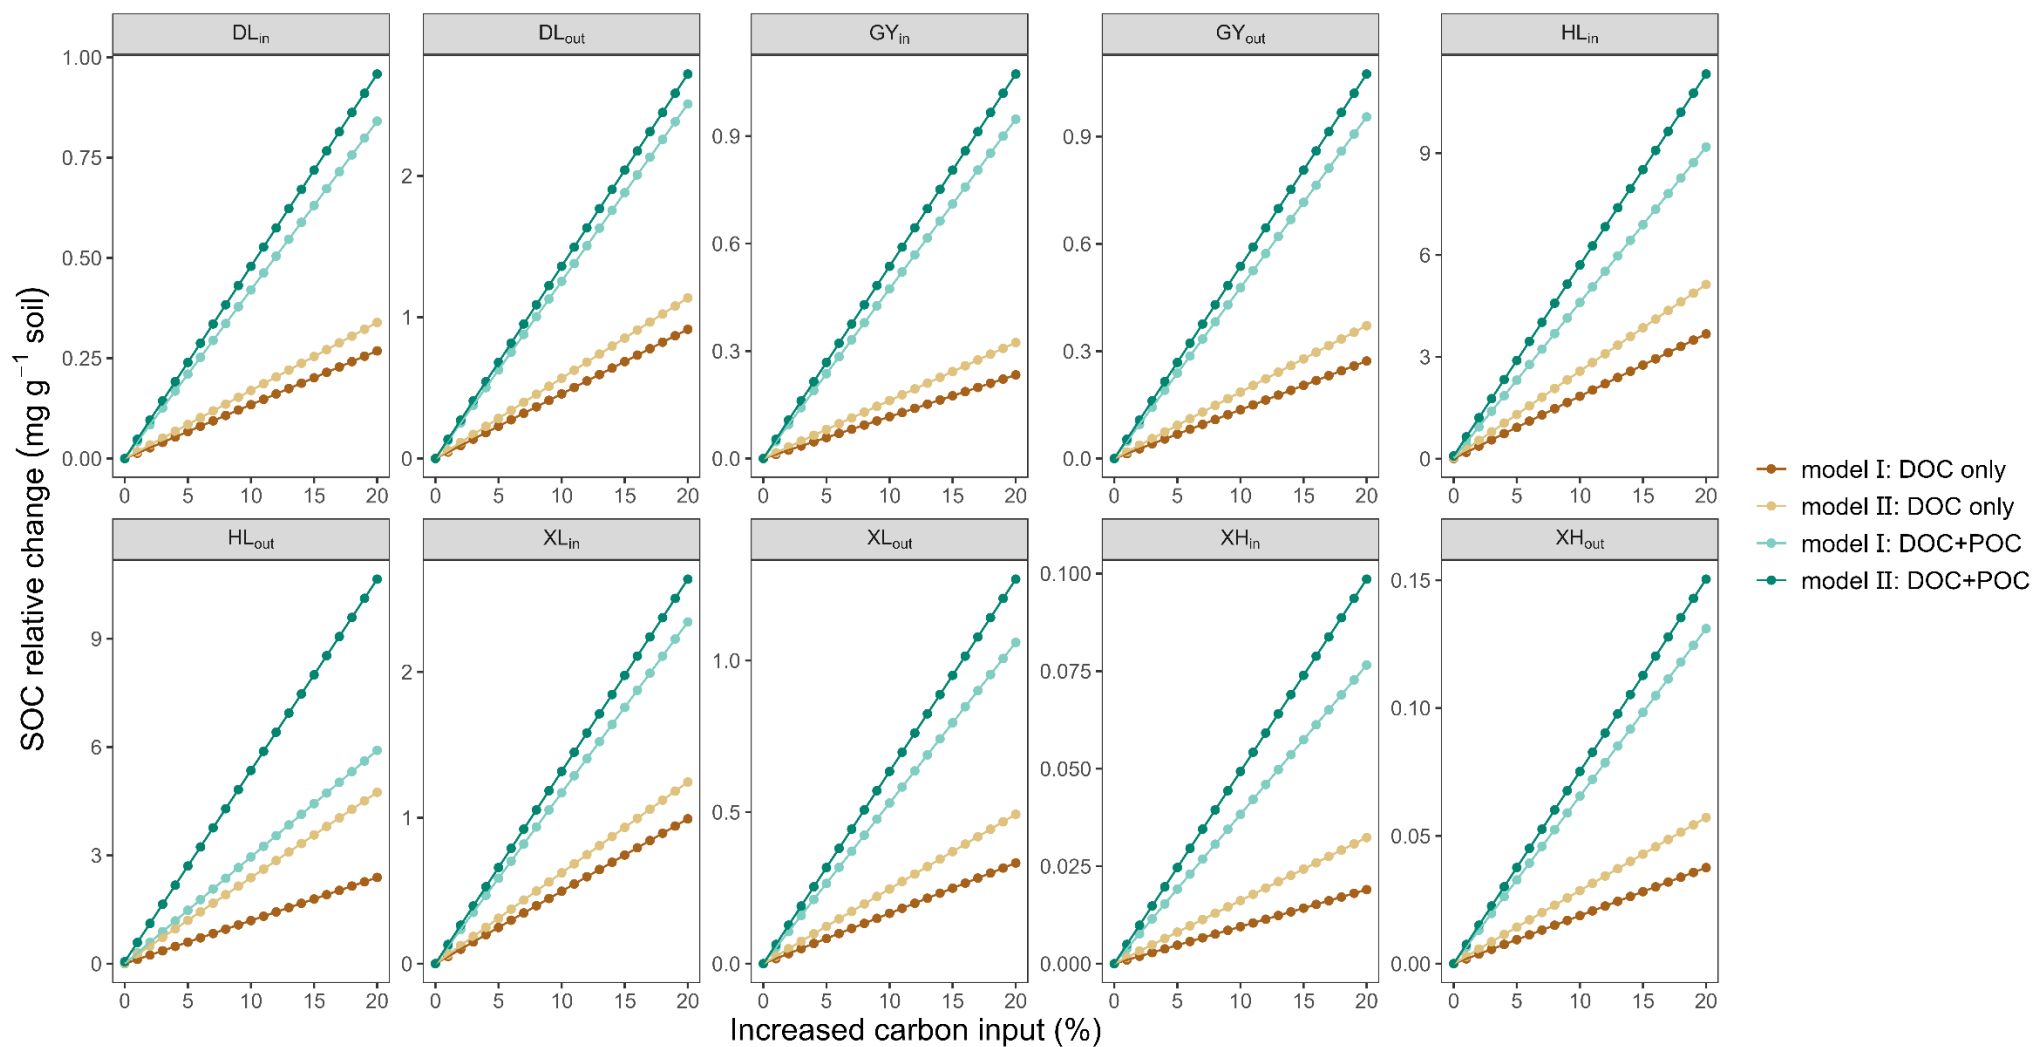

**Figure S4. Continuous relative changes in the steady state along a gradient of C input increase under two types of C input conditions. C input increase from 1% to 20% with a 1% interval.**

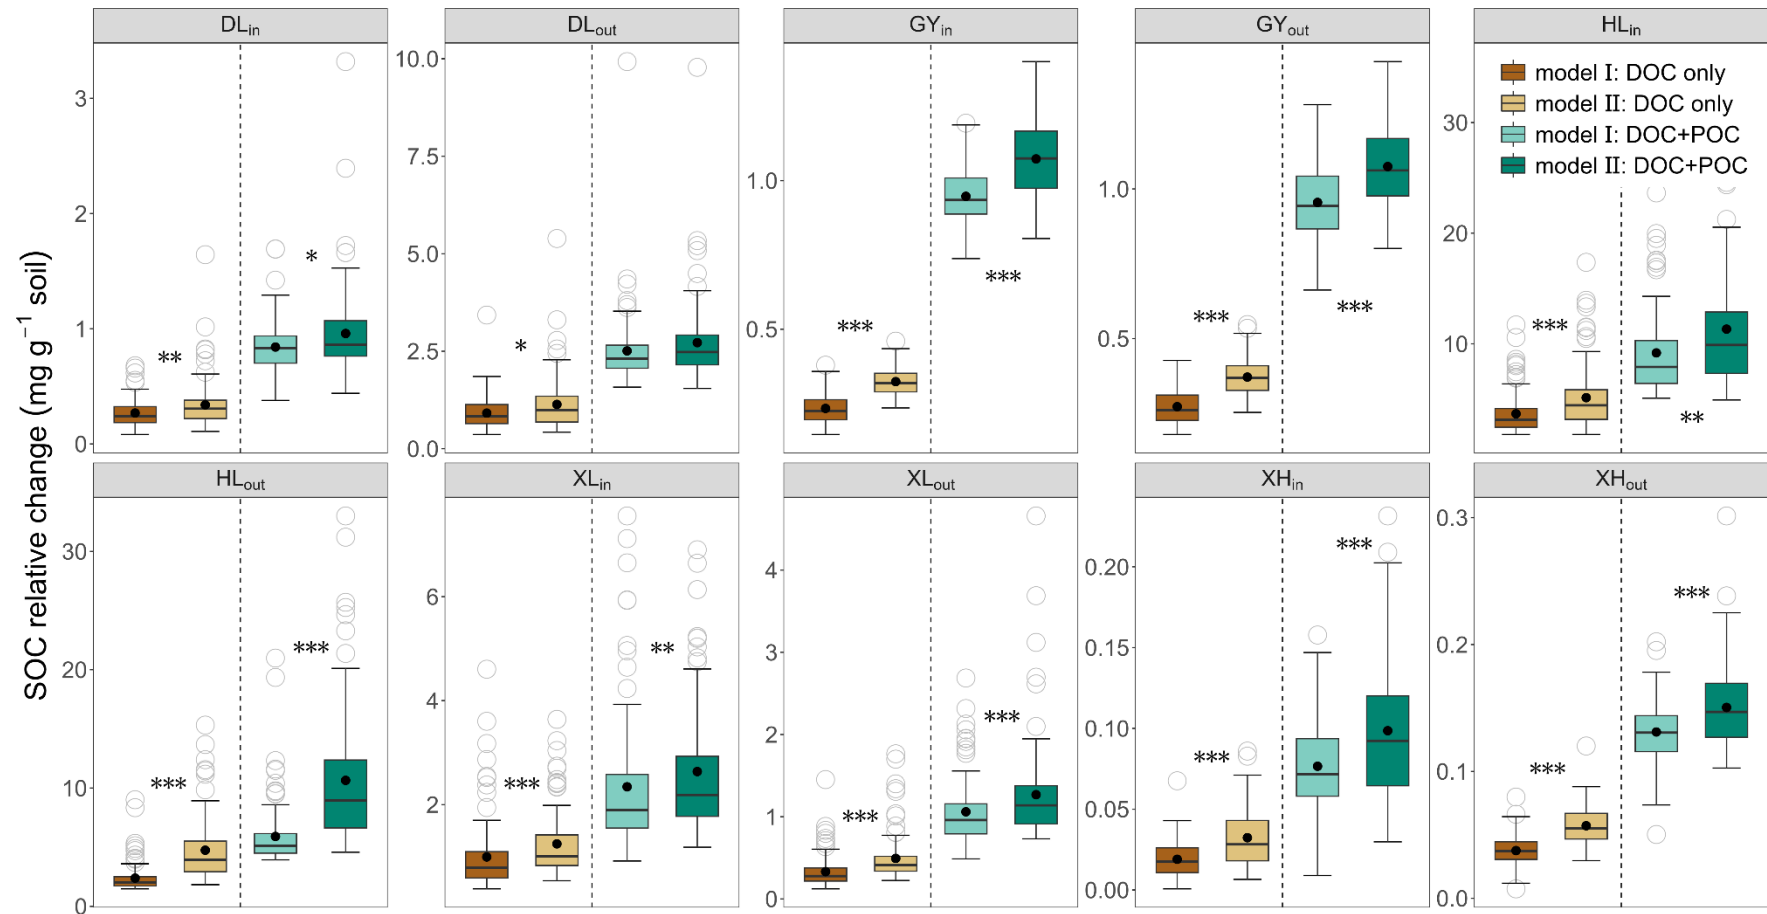

**Figure S5. Relative changes in steady state at 20% C input increase under two types of C input conditions.** The upper and lower ends of boxes denote the 0.25 and 0.75 percentiles, respectively. The solid line and solid dots in the box mark the median and mean of each dataset. Hollow dot denotes outliers.
