# Supplementary material for: Formation of particulate organic carbon from dissolved substrate input enhances soil carbon sequestration
Source: Copernicus journal article supplement (doi:10.5194/egusphere-2023-1483), 2023-07-25
Supplement: Supplementary file [file egusphere-2023-1483-AC2-supplement.pdf]

**Revised Table S2.** Results of the two-way analysis of variance (ANOVA) on the effects of sites, fencing, and their interaction (sites: fencing) on vegetation aboveground biomass, initial MBC, SOC, and soil mineral.

|                                     | Df | Sum Sq                | <i>F</i> -value    | <i>P</i> -value |
|-------------------------------------|----|-----------------------|--------------------|-----------------|
| <b>Aboveground biomass</b>          |    |                       |                    |                 |
| Sites                               | 4  | $1.52 \times 10^5$    | $2.14 \times 10^1$ | <0.001          |
| Fencing                             | 1  | $2.66 \times 10^5$    | $1.50 \times 10^2$ | <0.001          |
| Sites: Fencing                      | 4  | $1.20 \times 10^5$    | $1.69 \times 10^1$ | <0.001          |
| Residuals                           | 50 | $8.87 \times 10^4$    |                    |                 |
| <b>Initial MBC</b>                  |    |                       |                    |                 |
| Sites                               | 4  | 1.40                  | $7.17 \times 10^1$ | <0.001          |
| Fencing                             | 1  | $2.92 \times 10^{-2}$ | 5.98               | <0.05           |
| Sites: Fencing                      | 4  | $3.04 \times 10^{-2}$ | 1.56               | 0.211           |
| Residuals                           | 30 | $1.46 \times 10^{-1}$ |                    |                 |
| <b>Initial SOC</b>                  |    |                       |                    |                 |
| Sites                               | 4  | $1.04 \times 10^4$    | $5.36 \times 10^2$ | <0.001          |
| Fencing                             | 1  | $9.40 \times 10^1$    | $1.94 \times 10^1$ | <0.001          |
| Sites: Fencing                      | 4  | $1.31 \times 10^2$    | 6.74               | <0.01           |
| Residuals                           | 20 | $9.70 \times 10^1$    |                    |                 |
| <b>Soil mineral (Silt and clay)</b> |    |                       |                    |                 |
| Sites                               | 4  | $3.67 \times 10^3$    | $3.70 \times 10^2$ | <0.001          |
| Fencing                             | 1  | $1.60 \times 10^1$    | 6.32               | <0.05           |
| Sites: Fencing                      | 4  | $4.80 \times 10^1$    | 4.87               | <0.05           |
| Residuals                           | 10 | $2.50 \times 10^1$    |                    |                 |

**Revised Table S3.** Results of the two-way ANOVA on the effects of sites, fencing, and their interaction (sites: fencing) on glucose-derived SOC, MAOC, POC, MBC, DOC, and cumulative respiration. Cumulative respiration is the total respiration after 102d incubation calculated from the respiration rate. The SOC content is the sum of the sizes of the other four C pools combined.

|                               | Df | Sum Sq                | <i>F</i> -value       | <i>P</i> -value  |
|-------------------------------|----|-----------------------|-----------------------|------------------|
| <b>Glucose-derived SOC</b>    |    |                       |                       |                  |
| Sites                         | 4  | $3.85 \times 10^{-2}$ | $1.10 \times 10^2$    | <b>&lt;0.001</b> |
| Fencing                       | 1  | $9.00 \times 10^{-5}$ | $9.75 \times 10^{-1}$ | 0.331            |
| Sites: Fencing                | 4  | $9.00 \times 10^{-4}$ | 2.58                  | 0.058            |
| Residuals                     | 30 | $2.62 \times 10^{-3}$ |                       |                  |
| <b>Glucose-derived MAOC</b>   |    |                       |                       |                  |
| Sites                         | 4  | $3.94 \times 10^{-3}$ | $3.95 \times 10^1$    | <b>&lt;0.001</b> |
| Fencing                       | 1  | $3.18 \times 10^{-4}$ | $1.27 \times 10^1$    | <b>&lt;0.01</b>  |
| Sites: Fencing                | 4  | $4.78 \times 10^{-4}$ | 4.79                  | <b>&lt;0.01</b>  |
| Residuals                     | 30 | $7.48 \times 10^{-4}$ |                       |                  |
| <b>Glucose-derived POC</b>    |    |                       |                       |                  |
| Sites                         | 4  | $7.15 \times 10^{-3}$ | $1.74 \times 10^2$    | <b>&lt;0.001</b> |
| Fencing                       | 1  | $4.00 \times 10^{-5}$ | 3.85                  | 0.059            |
| Sites: Fencing                | 4  | $7.78 \times 10^{-4}$ | $1.90 \times 10^1$    | <b>&lt;0.001</b> |
| Residuals                     | 30 | $3.08 \times 10^{-4}$ |                       |                  |
| <b>Glucose-derived MBC</b>    |    |                       |                       |                  |
| Sites                         | 4  | $4.43 \times 10^{-3}$ | $1.83 \times 10^1$    | <b>&lt;0.001</b> |
| Fencing                       | 1  | $6.00 \times 10^{-6}$ | $1.02 \times 10^{-1}$ | 0.752            |
| Sites: Fencing                | 4  | $2.28 \times 10^{-4}$ | $9.37 \times 10^{-1}$ | 0.456            |
| Residuals                     | 30 | $1.82 \times 10^{-3}$ |                       |                  |
| <b>Glucose-derived DOC</b>    |    |                       |                       |                  |
| Sites                         | 4  | $1.62 \times 10^{-7}$ | 8.89                  | <b>&lt;0.001</b> |
| Fencing                       | 1  | $3.42 \times 10^{-8}$ | 7.50                  | <b>&lt;0.05</b>  |
| Sites: Fencing                | 4  | $5.08 \times 10^{-8}$ | 2.78                  | <b>&lt;0.05</b>  |
| Residuals                     | 30 | $1.37 \times 10^{-7}$ |                       |                  |
| <b>Cumulative respiration</b> |    |                       |                       |                  |
| Sites                         | 4  | $1.21 \times 10^3$    | $2.05 \times 10^2$    | <b>&lt;0.001</b> |
| Fencing                       | 1  | 8.40                  | 5.67                  | <b>&lt;0.05</b>  |
| Sites: Fencing                | 4  | $1.38 \times 10^1$    | 2.33                  | 0.079            |
| Residuals                     | 30 | $4.44 \times 10^1$    |                       |                  |

**Revised Table S4.** Multiple linear regression of cumulative respiration and glucose-derived SOC. Cumulative respiration is the total respiration after 102d incubation calculated from the respiration rate. Soil mineral was represented by the sum of clay and silt content.

|                                                                                             | Estimate | Std.Error | t value | P      |
|---------------------------------------------------------------------------------------------|----------|-----------|---------|--------|
| Cumulative respiration~soil mineral + SOC,<br>Multiple $R^2=0.8743$ , Adjusted $R^2=0.8384$ |          |           |         |        |
| Intercept                                                                                   | 6.229    | 1.842     | 3.382   | <0.05  |
| soil mineral                                                                                | -0.381   | 0.088     | -4.349  | <0.01  |
| SOC                                                                                         | 0.357    | 0.051     | 6.978   | <0.001 |
| Glucose-derived SOC~soil mineral,<br>Multiple $R^2=0.9185$ , Adjusted $R^2=0.9083$          |          |           |         |        |
| Intercept                                                                                   | 0.056    | 0.008     | 7.203   | <0.001 |
| soil mineral                                                                                | 0.003    | 0.000     | 9.497   | <0.001 |

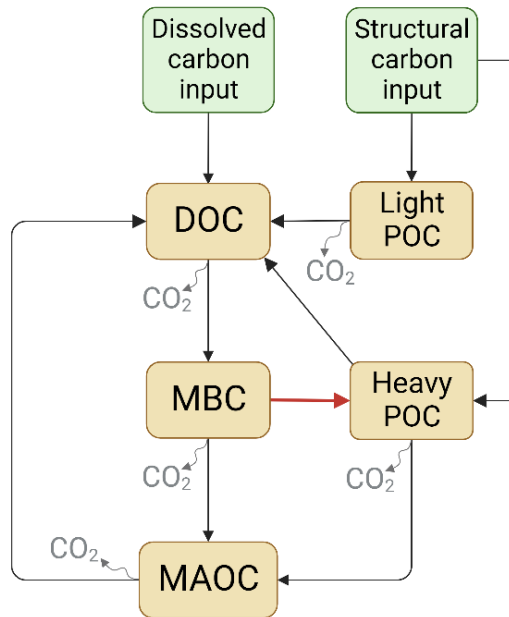

**Revised Figure 1. The model scheme of soil carbon (C) dynamics.** Model I and Model II share similar structure except that Model II includes a C flow from MBC to heavy-POC (red arrow) but Model I does not.

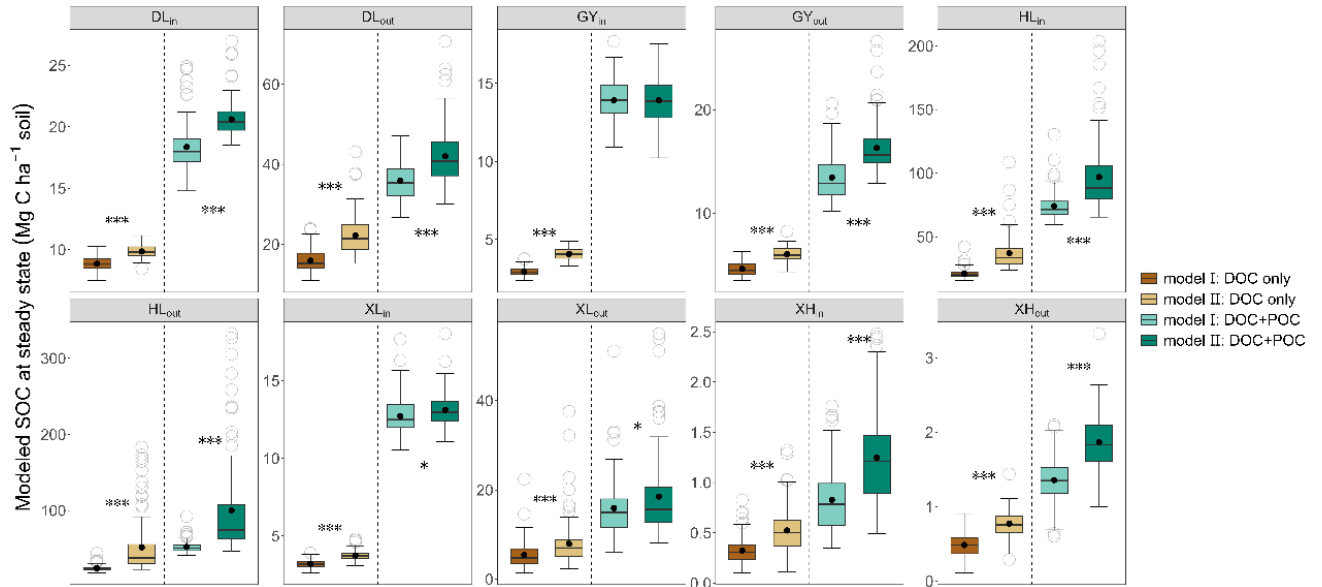

**Revised Figure 4: Modeled SOC content at steady state under two types of C input conditions.** The upper and lower ends of boxes denote the 0.25 and 0.75 percentiles, respectively. The solid line and solid dots in the box mark the median and mean of each dataset. Hollow dot denotes outliers. Asterisks represent significant differences between Model I and Model II (\*P < 0.05, \*\*P < 0.01, \*\*\*P < 0.001).

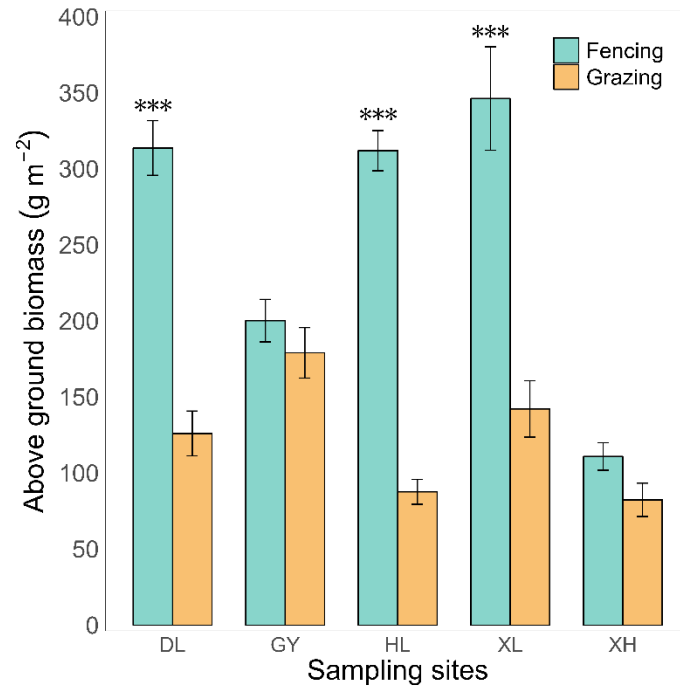

**Revised Figure S1. Response of above ground biomass to sites and fencing.** Error bars represent the standard errors.

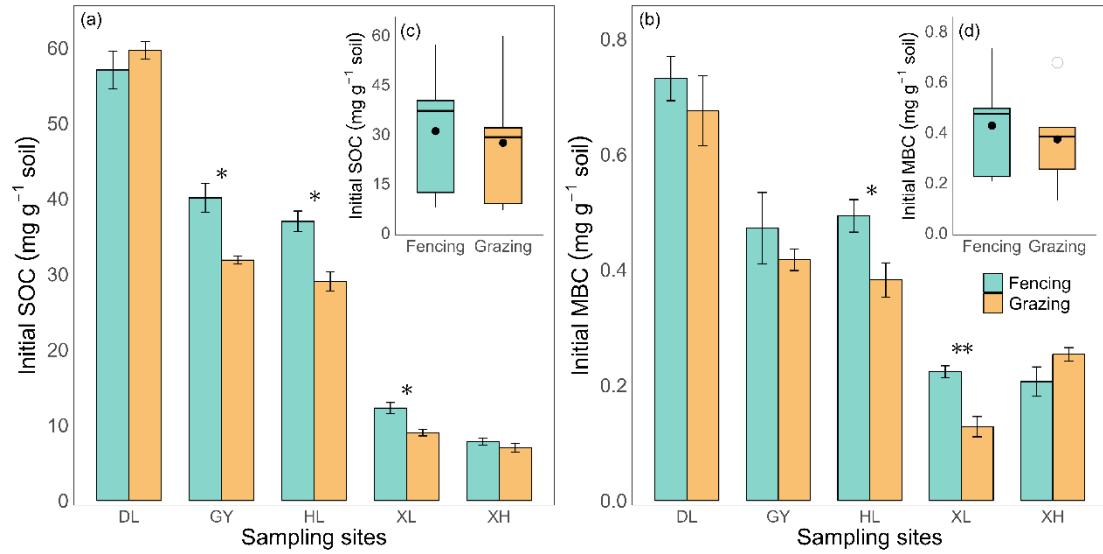

**Revised Figure S2. Response of initial SOC and MBC to sites and fencing.** Error bars represent the standard errors in bar graph. In the boxplot, the upper and lower ends of boxes denote the 0.25 and 0.75 percentiles, respectively. The solid line and solid dots in the box mark the median and mean of each dataset. Hollow dot denotes outliers. Asterisks represent significant differences between grazing and fencing (\*P < 0.05, \*\*P < 0.01).

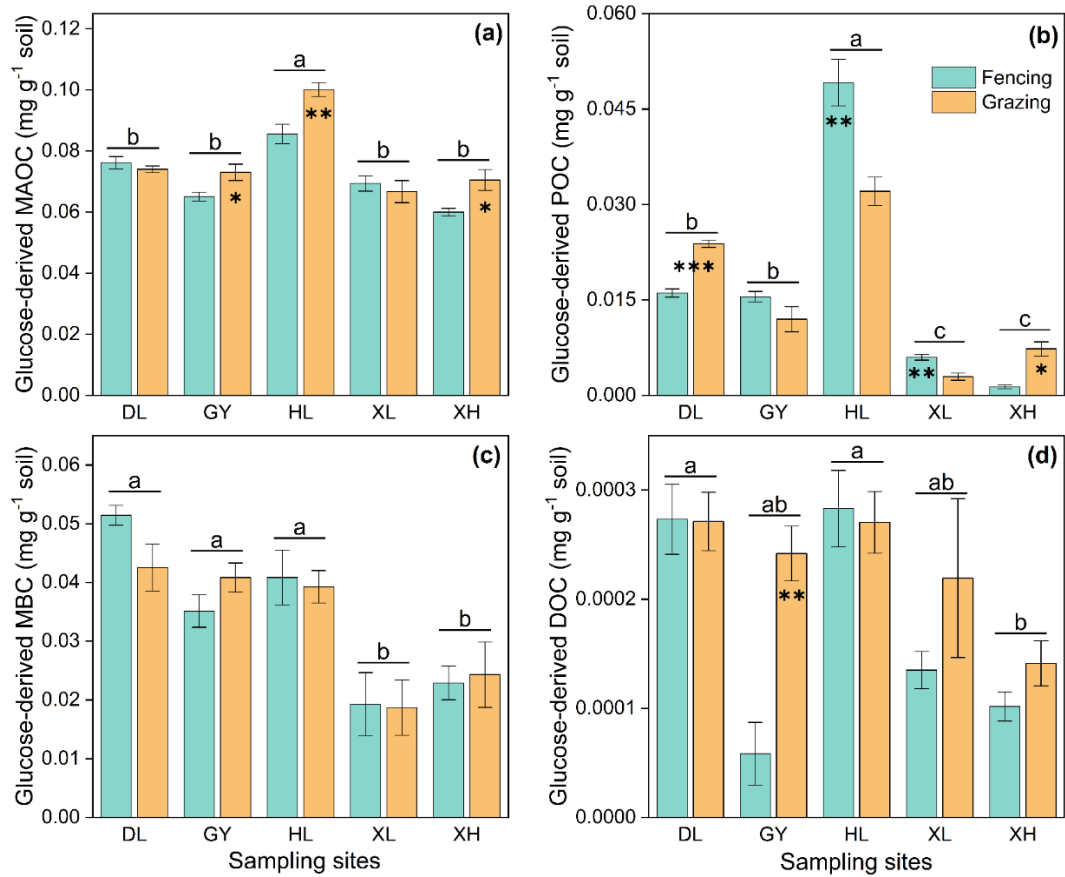

**Revised Figure S3. Response of C sequestration to sites and fencing.** **a.** Glucose-derived MAOC; **b.** Glucose-derived POC; **c.** Glucose-derived MBC; **d.** Glucose-derived DOC. The data are the means of four replicates and the error bars represent the standard errors of four replicates. Different letters above bars represent significant differences among sites ( $P < 0.05$ ). Asterisks represent significant differences between grazing and fencing treatment ( $*P < 0.05$ ,  $**P < 0.01$ ,  $***P < 0.001$ ).



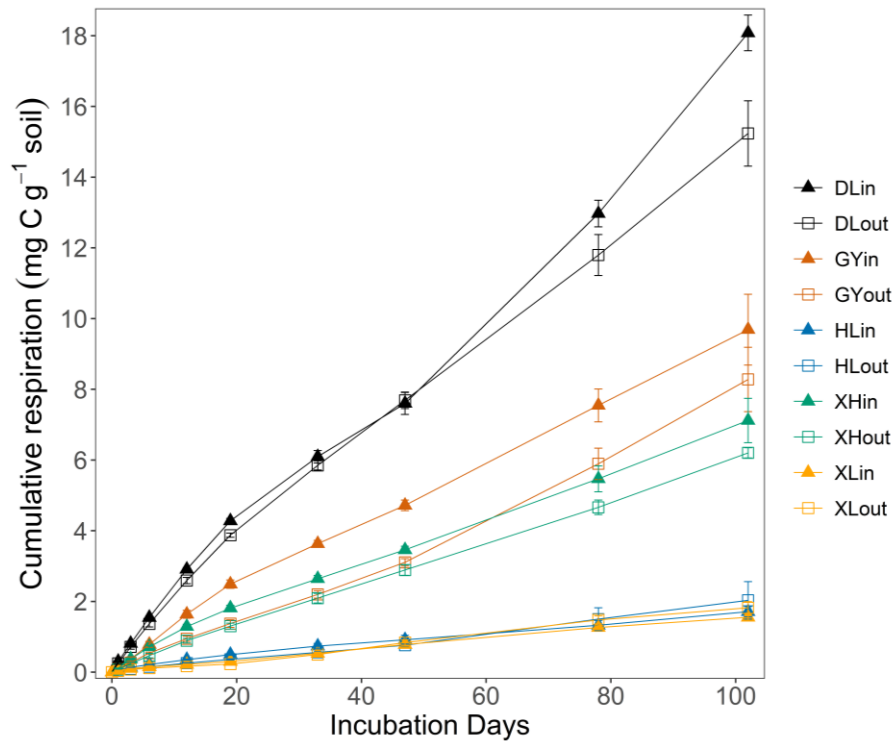

**Revised Figure S4. Response of soil cumulative respiration to sites and fencing.** The data are the means of four replicates and the error bars represent the standard errors of four replicates. The first two capital letters in the legend are the initials of the site, followed by "in" for grazing excluded grassland and "out" for grazing grassland.

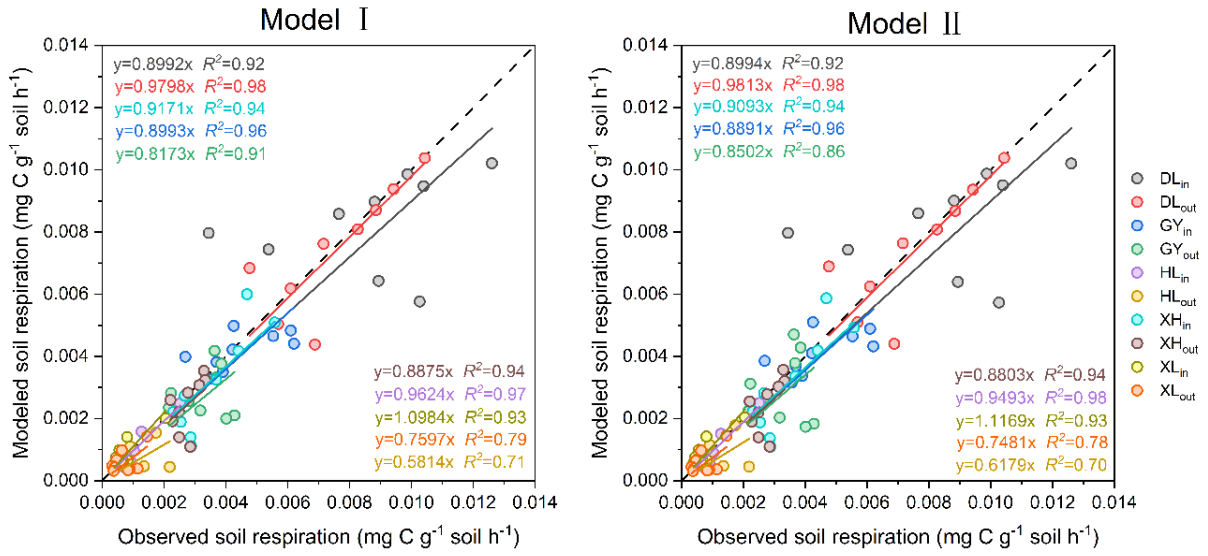

**Revised Figure S5. Comparison of observed and modeled CO<sub>2</sub> flux in the incubation experiment.** Diagonal black dotted line is 1:1 line.

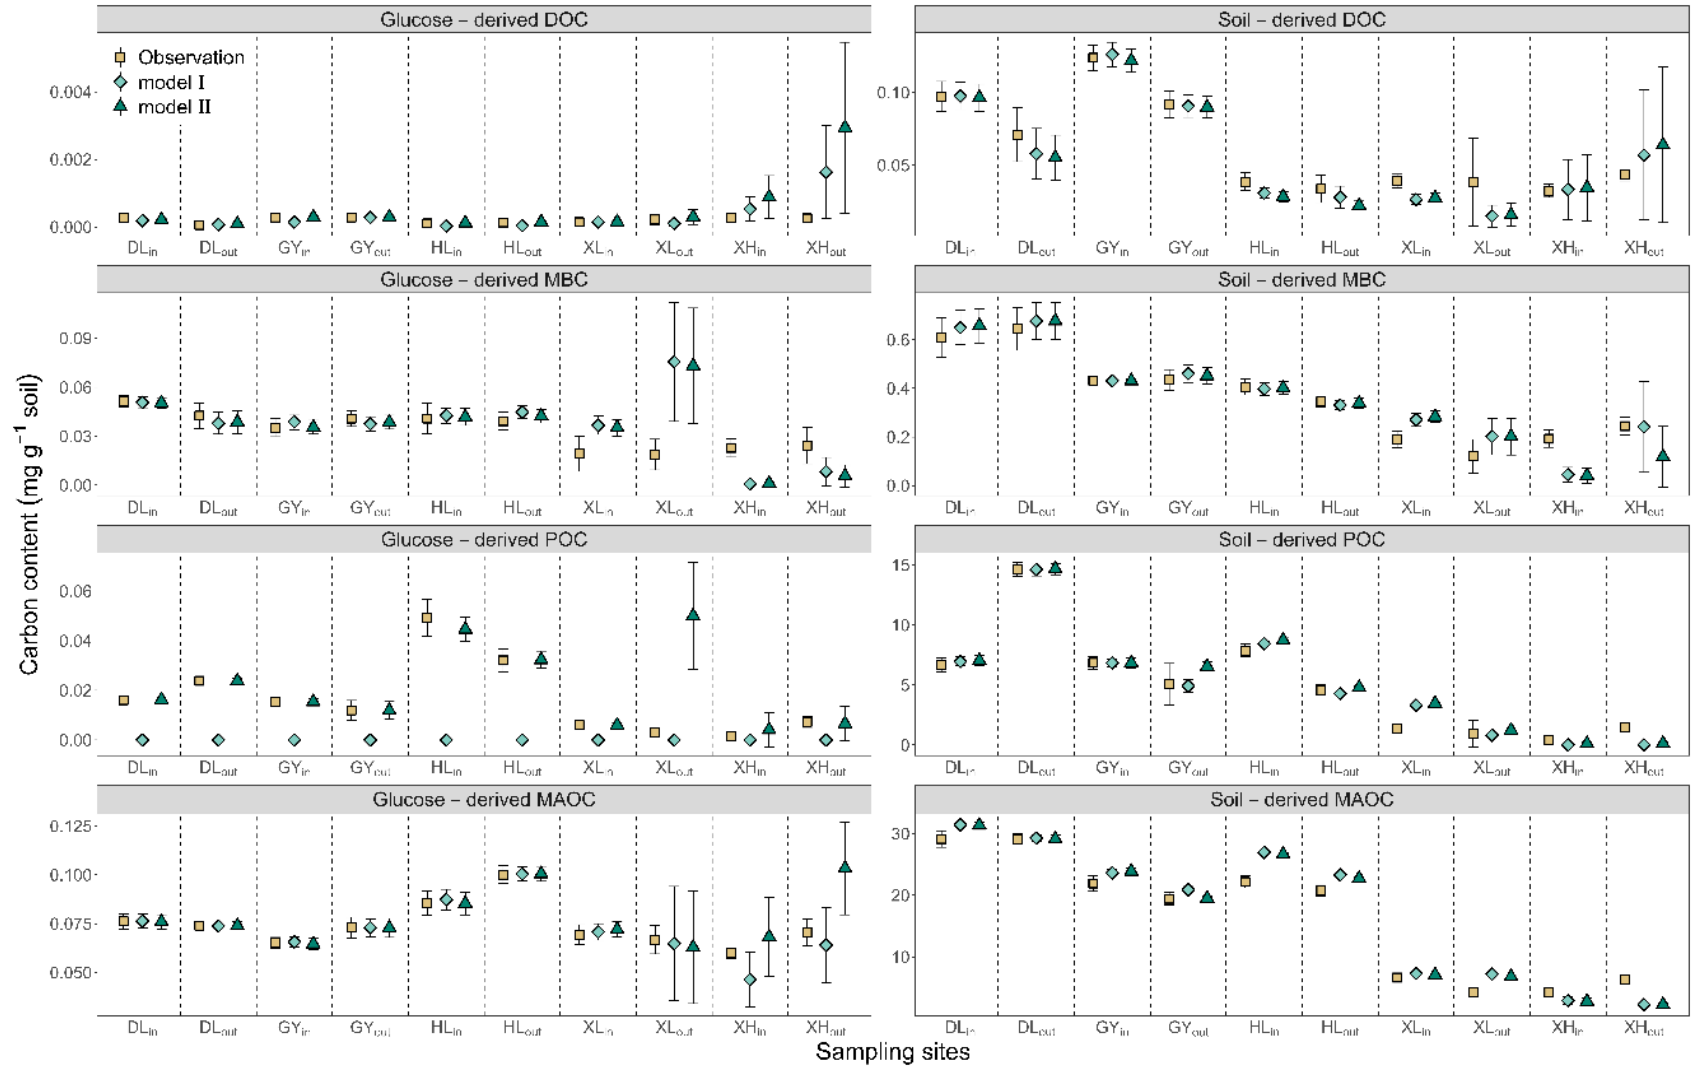

**Revised Figure S6. Observed and modeled soil C pools by Model I and II. The error bars represent the standard deviation of each dataset.**

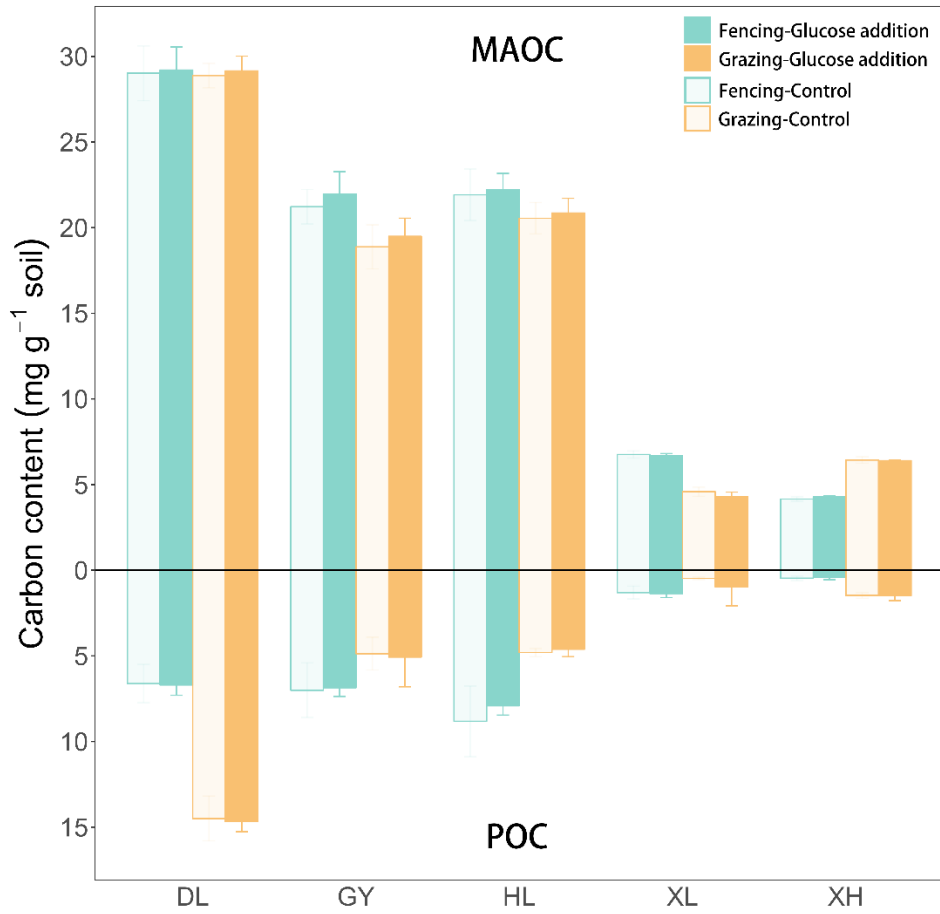

**Figure R1. MAOC and POC contents of glucose-added and control treatments at the end of incubation.** The top half of the figure represents MAOC, and the bottom half represents POC. filled bars represent the glucose-added treatment and open bars represent the control. Mean  $\pm$  SD.
